# Supplementary material
Source: ML conference proceedings conference paper supplement (https://openaccess.thecvf.com/content/ICCV2025/html/Zhang_WIPES_Wavelet-based_Visual_ICCV_2025_paper.html)
Supplement: Supplementary file 1 [file 8425_supp.pdf › 8425_supp.pdf]

# WIPES: Wavelet-based Visual Primitives

## Supplementary Material

### Outline

In this supplementary material, we provide a proof of the sufficiency of wavelet primitives as reconstruction kernels, along with a detailed explanation of their coordinate transformation process, and additional results that could not be included in the main text due to space constraints. The contents are organized as follows:

- **Sec. A:** Proof of the Sufficient Conditions for Using Wavelet Primitives as Reconstruction Kernels, Including Affine Closure, Local Support, and Integral Closure.
- **Sec. B:** The coordinate transformation process of 3D wavelet primitives and their corresponding parameters.
- **Sec. C:** Supplementary experiment for further validates the frequency flexibility of wavelet primitives.

### A. Proof of Wavelet Primitives as Reconstruction Kernels

As stated in the EWA splatting framework, a reconstruction kernel must satisfy both *affine closure* and *local support* properties, and its integrated 2D distribution obtained by integrating along one coordinate axis must be computed *explicitly*. In this section, we provide proofs for the affine closure and local support properties of the wavelet primitives and derive their corresponding integrated 2D distribution.

#### A.1. Proof of Affine Closure for Wavelet Primitives

To demonstrate the affine closure property of the wavelet primitive, we focus on its behavior under an affine transformation  $\vec{x}' = \mathbf{A}\vec{x} + \vec{b}$ , where  $\mathbf{A}$  is an invertible matrix and  $\vec{b}$  is a translation vector. We aim to show that there exist transformed parameters  $\vec{\mu}'$ ,  $\vec{f}'$ , and  $\Sigma'$  such that:

$$\mathcal{W}'(\vec{x}', \vec{\mu}', \vec{f}', \Sigma') = \frac{1}{2} \left[ \cos(\vec{f}' \cdot (\vec{x}' - \vec{\mu}')) + 1 \right] \mathcal{G}(\vec{x}', \vec{\mu}', \Sigma'). \quad (1)$$

#### Step 1: Affine Invariance of the Gaussian Term

The Gaussian component  $\mathcal{G}(\vec{x}, \vec{\mu}, \Sigma)$  inherently satisfies affine invariance. Under the transformation  $\vec{x}' = \mathbf{A}\vec{x} + \vec{b}$ ,

the parameters of the Gaussian update as:

$$\begin{aligned} \vec{\mu}' &= \mathbf{A}\vec{\mu} + \vec{b}, \\ \Sigma' &= \mathbf{A}\Sigma\mathbf{A}^T. \end{aligned} \quad (2)$$

This ensures that  $\mathcal{G}(\vec{x}, \vec{\mu}, \Sigma)$  retains its functional form in the transformed coordinates:

$$\mathcal{G}(\vec{x}, \vec{\mu}, \Sigma) \propto \mathcal{G}(\vec{x}', \vec{\mu}', \Sigma'), \quad (3)$$

where the proportionality constant arises from normalization factors but does not affect the closure property.

#### Step 2: Analyze the cosine modulation term

The critical step lies in proving that the cosine term  $\cos(\vec{f} \cdot (\vec{x} - \vec{\mu}))$  preserves its structure under the affine transformation. Substituting  $\vec{x} = \mathbf{A}^{-1}(\vec{x}' - \vec{b})$  into the original inner product:

$$\vec{f} \cdot (\vec{x} - \vec{\mu}) = \vec{f}^T (\mathbf{A}^{-1}(\vec{x}' - \vec{b}) - \vec{\mu}). \quad (4)$$

Rearranging terms:

$$\vec{f}^T \mathbf{A}^{-1}(\vec{x}' - \mathbf{A}\vec{\mu} - \vec{b}) = \vec{f}^T \mathbf{A}^{-1}(\vec{x}' - \vec{\mu}'). \quad (5)$$

To maintain the inner product form  $\vec{f}' \cdot (\vec{x}' - \vec{\mu}')$ , we define the transformed frequency vector as:

$$\vec{f}' = \mathbf{A}^{-\top} \vec{f}, \quad (6)$$

where  $\mathbf{A}^{-\top} = (\mathbf{A}^{-1})^\top$ . This ensures:

$$\vec{f}' \cdot (\vec{x}' - \vec{\mu}') = (\mathbf{A}^{-\top} \vec{f})^\top (\vec{x}' - \vec{\mu}') = \vec{f}^\top \mathbf{A}^{-1}(\vec{x}' - \vec{\mu}'), \quad (7)$$

which matches the original expression. Thus, the cosine modulation term retains its functional form under the affine transformation.

#### Step 3: Parameter Transformation and Closure

Combining the above results, for any affine transformation  $\vec{x}' = \mathbf{A}\vec{x} + \vec{b}$ , the function  $\mathcal{W}$  remains closed by updating its parameters as:

$$\vec{\mu}' = \mathbf{A}\vec{\mu} + \vec{b}, \quad \Sigma' = \mathbf{A}\Sigma\mathbf{A}^T, \quad \vec{f}' = \mathbf{A}^{-\top} \vec{f}. \quad (8)$$

The transformed function becomes:

$$\mathcal{W}'(\vec{x}', \vec{\mu}', \vec{f}', \Sigma') = \frac{1}{2} \left[ \cos(\vec{f}' \cdot (\vec{x}' - \vec{\mu}')) + 1 \right] \mathcal{G}(\vec{x}', \vec{\mu}', \Sigma'), \quad (9)$$

## A.2. Proof of Local Support for Wavelet Primitives

The wavelet primitives exhibits local support due to the following two key properties:

### Step 1: Dominant Exponential Decay from the Gaussian Kernel

The Gaussian term  $\mathcal{G}(\vec{x}, \vec{\mu}, \Sigma)$  decays exponentially as  $\|\vec{x} - \vec{\mu}\| \rightarrow \infty$ :

$$\mathcal{G} \sim \exp\left(-\frac{1}{2}(\vec{x} - \vec{\mu})^T \Sigma^{-1}(\vec{x} - \vec{\mu})\right). \quad (10)$$

For any positive-definite  $\Sigma$ , the quadratic form  $(\vec{x} - \vec{\mu})^T \Sigma^{-1}(\vec{x} - \vec{\mu})$  grows quadratically with  $\|\vec{x} - \vec{\mu}\|$ , ensuring  $\mathcal{G}$  vanishes rapidly outside a neighborhood of  $\vec{\mu}$ .

### Step 2: Bounded Modulating Cosine Term

The cosine modulation term satisfies:

$$0 \leq \frac{1}{2} [\cos(\vec{f} \cdot (\vec{x} - \vec{\mu})) + 1] \leq 1 \quad \forall \vec{x}. \quad (11)$$

While this term introduces spatial oscillations, its bounded amplitude does not counteract the exponential decay of  $\mathcal{G}$ .

### Step 3: Final Decay Behavior of Wavelet Primitives

Combining these results:

$$|\mathcal{W}(\vec{x})| \leq \mathcal{G}(\vec{x}, \vec{\mu}, \Sigma), \quad (12)$$

which inherits the Gaussian's exponential decay. Thus,  $\mathcal{W}(\vec{x})$  vanishes rapidly as  $\|\vec{x} - \vec{\mu}\|$  increases, confirming its strict local support around  $\vec{\mu}$ .

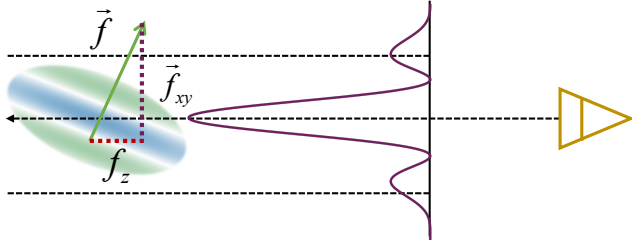

Figure 1. Projecting wavelet primitives along the  $z$ -axis onto the image plane.

## A.3. Proof of the Closed-Form Integration for Wavelet Primitives

Given the 3d wavelet primitives defined in Equation 6 in the main text, the integration along the  $z$ -axis is calculated as follows:

$$\int_{\mathbb{R}} \mathcal{W}(\vec{x}, \vec{\mu}, \vec{f}, \Sigma) dz = \int_{\mathbb{R}} \frac{1}{2} [\cos(\vec{f} \cdot (\vec{x} - \vec{\mu})) + 1] \mathcal{G}(\vec{x}, \vec{\mu}, \Sigma) dz, \quad (13)$$

We decompose the above integral into two parts, denoted as  $I_1$  and  $I_2$ :

$$\begin{aligned} I_1 &= \int_{\mathbb{R}} \frac{1}{2} \cos(\vec{f} \cdot (\vec{x} - \vec{\mu})) \mathcal{G}(\vec{x}, \vec{\mu}, \Sigma) dz \\ I_2 &= \int_{\mathbb{R}} \frac{1}{2} \mathcal{G}(\vec{x}, \vec{\mu}, \Sigma) dz. \end{aligned} \quad (14)$$

Since the integral result of  $I_2$  can be directly obtained by applying Equation 2 in the main text:

$$I_2 = \frac{1}{2} \mathcal{G}'(\vec{x}', \vec{\mu}', \Sigma'), \quad (15)$$

we provide a detailed derivation of the integral  $I_1$  in the following section.

### Step 1: Expanding the Cosine Term

By applying Euler's formula  $e^{ix} = \cos x + i \sin x$ , we expand the cosine term in  $I_1$  as follows:

$$I_1 = \frac{1}{2} \int_{\mathbb{R}} \text{Re} \left[ e^{i\vec{f} \cdot (\vec{x} - \vec{\mu})} \mathcal{G}(\vec{x}, \vec{\mu}, \Sigma) \right] dz. \quad (16)$$

Leveraging the linearity of integration and the linear structure of complex numbers, the integral simplifies to:

$$I_1 = \frac{1}{2} \text{Re} \left[ \int_{\mathbb{R}} e^{i\vec{f} \cdot (\vec{x} - \vec{\mu})} \mathcal{G}(\vec{x}, \vec{\mu}, \Sigma) dz \right]. \quad (17)$$

### Step 2: Variable and Matrix Decomposition

We decompose the vectors  $\vec{x}$ ,  $\vec{\mu}$ , and  $\vec{f}$  into components parallel and perpendicular to the  $xy$ -plane. Specifically, each vector is separated into its  $xy$ -plane projection and the corresponding component along the  $z$ -axis:

$$\vec{x} = \begin{bmatrix} \vec{x}' \\ z \end{bmatrix}, \quad \vec{\mu} = \begin{bmatrix} \vec{\mu}' \\ \mu_z \end{bmatrix}, \quad \vec{f} = \begin{bmatrix} \vec{f}' \\ f_z \end{bmatrix}, \quad (18)$$

where  $\vec{x}' = (x, y)^T$ ,  $\vec{\mu}' = (\mu_x, \mu_y)^T$ ,  $\vec{f}' = (f_x, f_y)^T$ .

Similarly, the covariance matrix is partitioned into a block matrix:

$$\Sigma^{-1} = \begin{bmatrix} \mathbf{A} & \vec{B} \\ \vec{B}^T & C \end{bmatrix}, \quad (19)$$

where  $\mathbf{A} \in \mathbb{R}^{2 \times 2}$ ,  $\vec{B} \in \mathbb{R}^{2 \times 1}$ , and  $C \in \mathbb{R}$ .

### Step 3: Substituting Decomposed Variables

Substituting the decomposed vectors and matrix into the exponential and Gaussian terms, we expand the exponential term as:

$$e^{i\vec{f} \cdot (\vec{x} - \vec{\mu})} = e^{i\vec{f}' \cdot (\vec{x}' - \vec{\mu}')} e^{if_z(z - \mu_z)}. \quad (20)$$

Similarly, the Gaussian term expands to:

$$e^{-\frac{1}{2}(\vec{x}' - \vec{\mu}')^T \mathbf{A}(\vec{x}' - \vec{\mu}') + (\vec{x}' - \vec{\mu}')^T \vec{B}(z - \mu_z) - \frac{1}{2}C(z - \mu_z)^2}. \quad (21)$$

Since the integration is with respect to  $z$ , we treat all terms containing  $z$  as integration variables and regard all remaining terms as constants. Thus, the integral becomes:

$$I_1 = \frac{1}{2} \text{Re} \left[ e^{i\vec{f}' \cdot (\vec{x}' - \vec{\mu}')} e^{-\frac{1}{2}(\vec{x}' - \vec{\mu}')^T \mathbf{A}(\vec{x}' - \vec{\mu}')} I_z \right], \quad (22)$$

where

$$I_z = \int_{\mathbb{R}} e^{if_z(z - \mu_z)} e^{-\frac{1}{2}C(z - \mu_z)^2 - (\vec{x}' - \vec{\mu}')^T \vec{B}(z - \mu_z)} dz. \quad (23)$$

Then, we combine the exponential terms associated with  $z$ :

$$s = -\frac{1}{2}C(z - \mu_z)^2 - (\vec{x}' - \vec{\mu}')^\top \vec{B}(z - \mu_z) + if_z(z - \mu_z). \quad (24)$$

For convenience, we define:

$$v = -(\vec{x}' - \vec{\mu}')^\top \vec{B} + if_z, \quad (25)$$

which allows us to express  $s$  as:

$$s = -\frac{1}{2}C(z - \mu_z)^2 + v(z - \mu_z). \quad (26)$$

#### Step 4: Completing the Square and Evaluating the Integral

We complete the square for the quadratic terms in  $s$  as follows:

$$s = -\frac{1}{2}C\left(z - \mu_z - \frac{v}{C}\right)^2 + \frac{v^2}{2C}. \quad (27)$$

Substituting, the integral  $I_z$  becomes:

$$I_z = e^{\frac{v^2}{2C}} \int_{\mathbb{R}} e^{-\frac{1}{2}C\left(z - \mu_z - \frac{v}{C}\right)^2} dz. \quad (28)$$

Applying the change of variable  $t = z - \mu_z - \frac{v}{C}$  transforms the integral into a standard Gaussian form:

$$\int_{-\infty}^{\infty} e^{-\frac{1}{2}Ct^2} dt = \sqrt{\frac{2\pi}{C}}. \quad (29)$$

Thus,  $I_z$  evaluates to:

$$e^{\frac{v^2}{2C}} \sqrt{\frac{2\pi}{C}}. \quad (30)$$

#### Step 5: Combining Results and Simplification

Substituting  $I_z$  into the expression for  $I_1$ , and expanding  $v$ , we obtain the following.

$$I_1 = \frac{1}{2} \sqrt{\frac{2\pi}{C}} e^{-\frac{1}{2}(\vec{x}' - \vec{\mu}')^\top \left(\mathbf{A} - \frac{\vec{B}\vec{B}^\top}{C}\right)(\vec{x}' - \vec{\mu}') - \frac{f_z^2}{2C}} \times \cos\left(\left(\vec{f}' + \frac{f_z \vec{B}^\top}{C}\right) \cdot (\vec{x}' - \vec{\mu}')\right). \quad (31)$$

Figure x illustrates that when projecting wavelet primitives along the  $z$ -axis onto the image plane, the frequency component associated with the  $z$ -axis vanishes. Similarly, as described in EWA splatting, the third row and third column of the covariance matrix, corresponding to the  $z$ -axis, are also set to zero during projection. Therefore, setting  $f_z = 0$  and the corresponding elements of vector  $\vec{B} = 0$  in the equation above, we obtain the final integral  $I_1$  as follows:

$$I_1 = \frac{1}{2} \sqrt{2\pi} \mathcal{G}'(\vec{x}', \vec{\mu}', \Sigma') \cos\left(\vec{f}' \cdot (\vec{x}' - \vec{\mu}')\right). \quad (32)$$

#### Conclusion

Since the constant terms  $\sqrt{2\pi}$  in the integral  $I_1$  can be absorbed into the opacity parameter, which is learned during the optimization process, we obtain the following simplified form:

$$I_1 = \frac{1}{2} \mathcal{G}'(\vec{x}', \vec{\mu}', \Sigma') \cos\left(\vec{f}' \cdot (\vec{x}' - \vec{\mu}')\right). \quad (33)$$

Finally, we obtain the following expression for the 3D wavelet primitive, as shown in Equation 7 in the main text:

$$\begin{aligned} \int_{\mathbb{R}} \mathcal{W}(\vec{x}, \vec{\mu}, \vec{f}, \Sigma) dz &= \frac{1}{2} [\cos(\vec{f}' \cdot (\vec{x}' - \vec{\mu}')) + 1] \mathcal{G}'(\vec{x}', \vec{\mu}', \Sigma') \\ &= \mathcal{W}'(\vec{x}', \vec{\mu}', \vec{f}', \Sigma') \end{aligned} \quad (34)$$

### B. Detailed of the Coordinate Transformation for 3D Wavelet Primitives

In this section, we provide a detailed explanation of the coordinate transformation process for 3D wavelet primitives. To better differentiate among the various coordinate spaces, we denote the wavelet primitive in world space as  $\mathcal{W}_w$ , in camera space as  $\mathcal{W}_c$ , in ray space as  $\mathcal{W}_r$ , and in image space as  $\mathcal{W}_i$ , and other related variables are defined similarly.

First, we use the world-to-camera matrix  $\mathbf{W}$  to convert the world space  $\vec{x}_w$  into the camera space  $\vec{x}_c$

$$\vec{x}_c = \mathbf{W} \vec{x}_w. \quad (35)$$

Then, we substitute  $\vec{x}_w = \mathbf{W}^{-1} \vec{x}_c$  back into the wavelet primitive expression in world space, and obtain the frequency vector and covariance matrix of the wavelet primitive in the camera space:

$$\begin{aligned} \vec{f}_c &= \vec{f}_w \mathbf{W}^{-1} \\ \Sigma_c &= \mathbf{W} \Sigma_w \mathbf{W}^\top \end{aligned} \quad (36)$$

Secondly, we follow the same approach as EWA splatting and 3DGS to transform the wavelet reconstruction kernel from the camera space into ray space, compute the Jacobian matrix  $\mathbf{J}$ , and approximate the mapping as an affine transformation using a first-order Taylor expansion:

$$\vec{x}_r = \mathbf{J} \vec{x}_c. \quad (37)$$

Similarly, we substitute  $\vec{x}_c = \mathbf{J}^{-1} \vec{x}_r$  back into the wavelet primitive expression in the camera space, obtaining the frequency vector and covariance matrix of the wavelet primitive in ray space:

$$\begin{aligned} \vec{f}_r &= \vec{f}_c \mathbf{J}^{-1} \\ \Sigma_r &= \mathbf{J} \Sigma_c \mathbf{J}^\top. \end{aligned} \quad (38)$$

In summary, we obtain the relationship between the frequency vector and the covariance matrix in ray space and

world space:

$$\begin{aligned}\vec{f}_r &= \vec{f}_w \mathbf{W}^{-1} \mathbf{J}^{-1} \\ &= \vec{f}_w (\mathbf{J} \mathbf{W})^{-1} \\ \Sigma_r &= \mathbf{J} \mathbf{W} \Sigma_w \mathbf{J}^\top \mathbf{W}^\top,\end{aligned}\tag{39}$$

which is consistent with the results presented in the main text.

Finally, we project the ray-space wavelet primitive directly into image space. The covariance matrix and frequency vector in image space correspond to the  $2 \times 2$  submatrix and  $2 \times 1$  subvector of the ray-space covariance matrix and frequency vector, respectively.

### C. Additional Results For the Frequency Flexibility of Wavelet Primitives.

To thoroughly validate that the proposed wavelet primitives effectively represent both high- and low-frequency components of visual signals, rather than being limited to high-frequency features, we conducted experiments using 100k primitives for Gaussian and wavelets primitives. We randomly selected 10 images from the DIV2K dataset and applied Gaussian blur with  $\sigma = 3, 7, 11$ . Since WIPES adaptively learns the frequency parameters, it consistently outperforms Gaussian primitives across all blur levels (Tab. 1).

Table 1. PSNR and MS-SSIM across blur levels.

| Method | level-1 ( $\sigma = 3$ ) |               | level-2 ( $\sigma = 7$ ) |               | level-3 ( $\sigma = 11$ ) |               |
|--------|--------------------------|---------------|--------------------------|---------------|---------------------------|---------------|
|        | PSNR                     | MS-SSIM       | PSNR                     | MS-SSIM       | PSNR                      | MS-SSIM       |
| GS     | 49.07                    | 0.9991        | 51.14                    | <b>0.9996</b> | 50.64                     | 0.9990        |
| WIPES  | <b>55.45</b>             | <b>0.9995</b> | <b>55.35</b>             | 0.9995        | <b>56.48</b>              | <b>0.9995</b> |
